# Supplementary material for: Heterobimetallic cyanide-bridged FeIII(μ-CN)MIIcomplexes (M = Mn and Cu): synthesis, structure and magnetism
Source: Royal Society of Chemistry journal article supplement (doi:10.1039/d2nj00126h), 2022-01-01
Supplement: d2nj00126h1.pdf [file d2nj00126h1.pdf]

**Electronic Supporting Information**

**Heterobimetallic cyanide-bridged  $\text{Fe}^{\text{III}}(\mu\text{-CN})\text{M}^{\text{II}}$  complexes (M = Mn and Cu). Synthesis, structure and magnetism†**

**Sayeed Ahmed, Akhilesh Kumar, Narottam Mukhopadhyay, Francesc Lloret and Rabindranath Mukherjee\***

**Figures:**

**Fig. S1**  $^1\text{H}$  NMR spectra of (a)  $\text{L}^1$  and (b)  $\text{L}^2$  in  $\text{CDCl}_3$ .

**Fig. S2** Perspective view of metal coordination environment in  $[\text{Fe}^{\text{III}}(\text{Tp})(\text{CN})_2(\mu\text{-CN})\text{-Mn}^{\text{II}}\text{Cl}(\text{L}^1)]\cdot 3\text{DMF}\cdot 3\text{H}_2\text{O}$  (**1**) (both PART 1 and PART 2).

**Fig. S3** Perspective view of metal coordination environment in  $[\text{Fe}^{\text{III}}(\text{Tp})(\text{CN})_2(\mu\text{-CN})\text{Mn}^{\text{II}}\text{Cl}(\text{L}^2)]\cdot \text{DMF}$  (**2**) with modelled DMF molecules (both PART 1 and PART 2).

**Fig. S4** Perspective view of metal coordination environment in  $[\text{Fe}^{\text{III}}(\text{Tp})(\text{CN})_2(\mu\text{-CN})\text{-Cu}^{\text{II}}(\text{L}^1)](\text{ClO}_4)\cdot 2\text{CH}_3\text{OH}$  (**3**) (both PART 1 and PART 2).

**Fig. S5** XPRD spectra of (a)  $[\text{Fe}^{\text{III}}(\text{Tp})(\text{CN})_2(\mu\text{-CN})\text{Mn}^{\text{II}}\text{Cl}(\text{L}^1)]\cdot 3\text{DMF}\cdot 3\text{H}_2\text{O}$  (**1**), (b)  $[\text{Fe}^{\text{III}}(\text{Tp})(\text{CN})_2(\mu\text{-CN})\text{Mn}^{\text{II}}\text{Cl}(\text{L}^2)]\cdot \text{DMF}$  (**2**), (c)  $[\text{Fe}^{\text{III}}(\text{Tp})(\text{CN})_2(\mu\text{-CN})\text{Cu}^{\text{II}}(\text{L}^1)](\text{ClO}_4)\cdot 2\text{CH}_3\text{OH}$  (**3**) and (d)  $[\text{Fe}^{\text{III}}(\text{Tp})(\text{CN})_2(\mu\text{-CN})\text{Cu}^{\text{II}}(\text{L}^2)](\text{ClO}_4)\cdot 2\text{CH}_3\text{CN}$  (**4**).

**Fig. S6** IR spectra (in KBr) of (a)  $[\text{Fe}^{\text{III}}(\text{Tp})(\text{CN})_2(\mu\text{-CN})\text{Mn}^{\text{II}}\text{Cl}(\text{L}^1)]\cdot 3\text{DMF}\cdot 3\text{H}_2\text{O}$  (**1**), (b)  $[\text{Fe}^{\text{III}}(\text{Tp})(\text{CN})_2(\mu\text{-CN})\text{Mn}^{\text{II}}\text{Cl}(\text{L}^2)]\cdot \text{DMF}$  (**2**), (c)  $[\text{Fe}^{\text{III}}(\text{Tp})(\text{CN})_2(\mu\text{-CN})\text{Cu}^{\text{II}}(\text{L}^1)](\text{ClO}_4)\cdot 2\text{CH}_3\text{OH}$  (**3**) and (d)  $[\text{Fe}^{\text{III}}(\text{Tp})(\text{CN})_2(\mu\text{-CN})\text{Cu}^{\text{II}}(\text{L}^2)](\text{ClO}_4)\cdot 2\text{CH}_3\text{CN}$  (**4**).

**Fig. S7** Electronic spectrum in  $\text{CH}_3\text{CN}$  of (a)  $[\text{Fe}^{\text{III}}(\text{Tp})(\text{CN})_2(\mu\text{-CN})\text{Mn}^{\text{II}}\text{Cl}(\text{L}^1)]\cdot 3\text{DMF}\cdot 3\text{H}_2\text{O}$  (**1**), (b)  $[\text{Fe}^{\text{III}}(\text{Tp})(\text{CN})_2(\mu\text{-CN})\text{Mn}^{\text{II}}\text{Cl}(\text{L}^2)]\cdot \text{DMF}$  (**2**), (c)  $[\text{Fe}^{\text{III}}(\text{Tp})(\text{CN})_2(\mu\text{-CN})\text{Cu}^{\text{II}}(\text{L}^1)](\text{ClO}_4)\cdot 2\text{CH}_3\text{OH}$  (**3**) and (d)  $[\text{Fe}^{\text{III}}(\text{Tp})(\text{CN})_2(\mu\text{-CN})\text{Cu}^{\text{II}}(\text{L}^2)](\text{ClO}_4)\cdot 2\text{CH}_3\text{CN}$  (**4**).

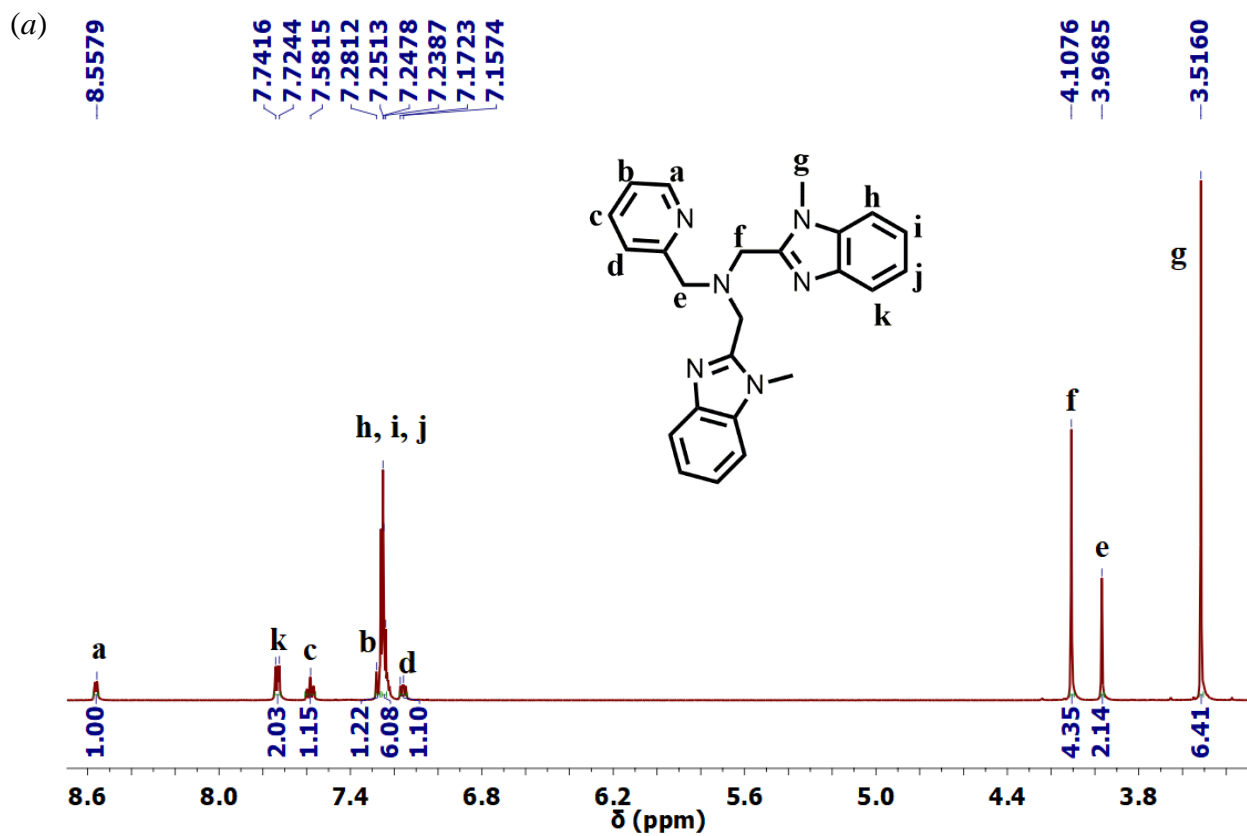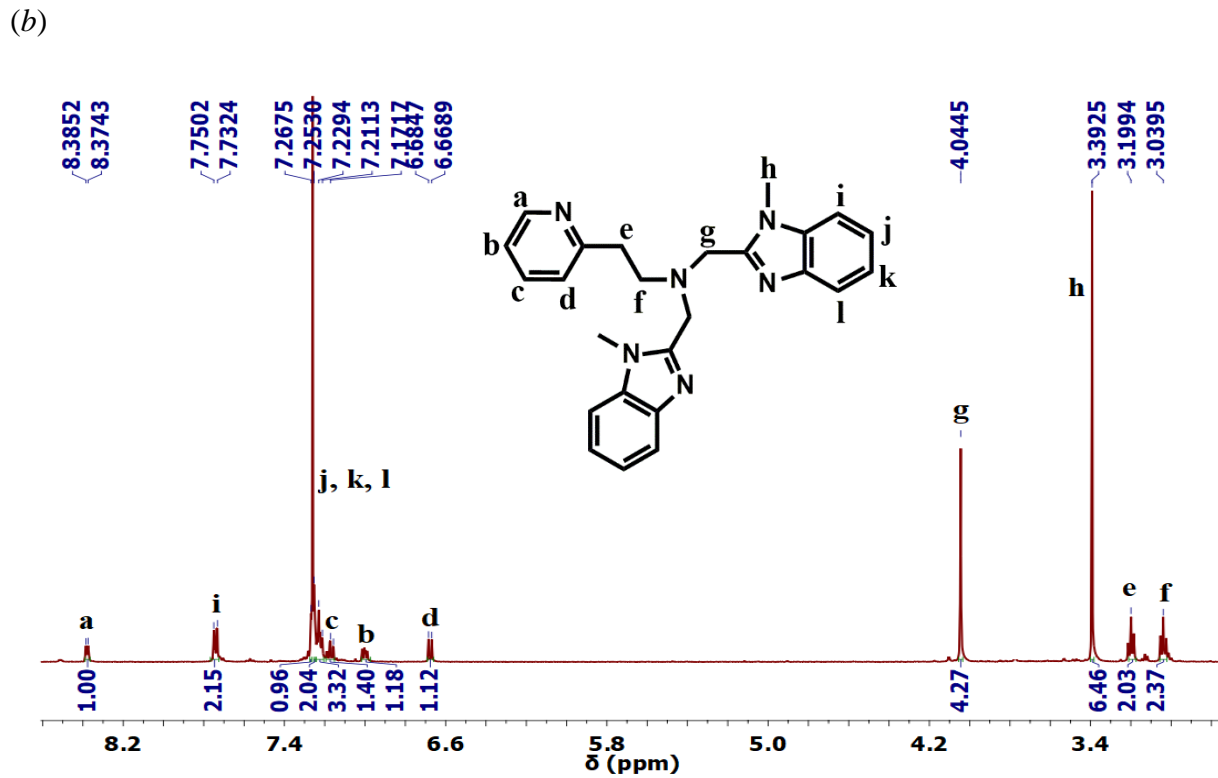

Fig. S1  $^1\text{H}$  NMR spectra of (a)  $L^1$  and (b)  $L^2$  in  $\text{CDCl}_3$ .

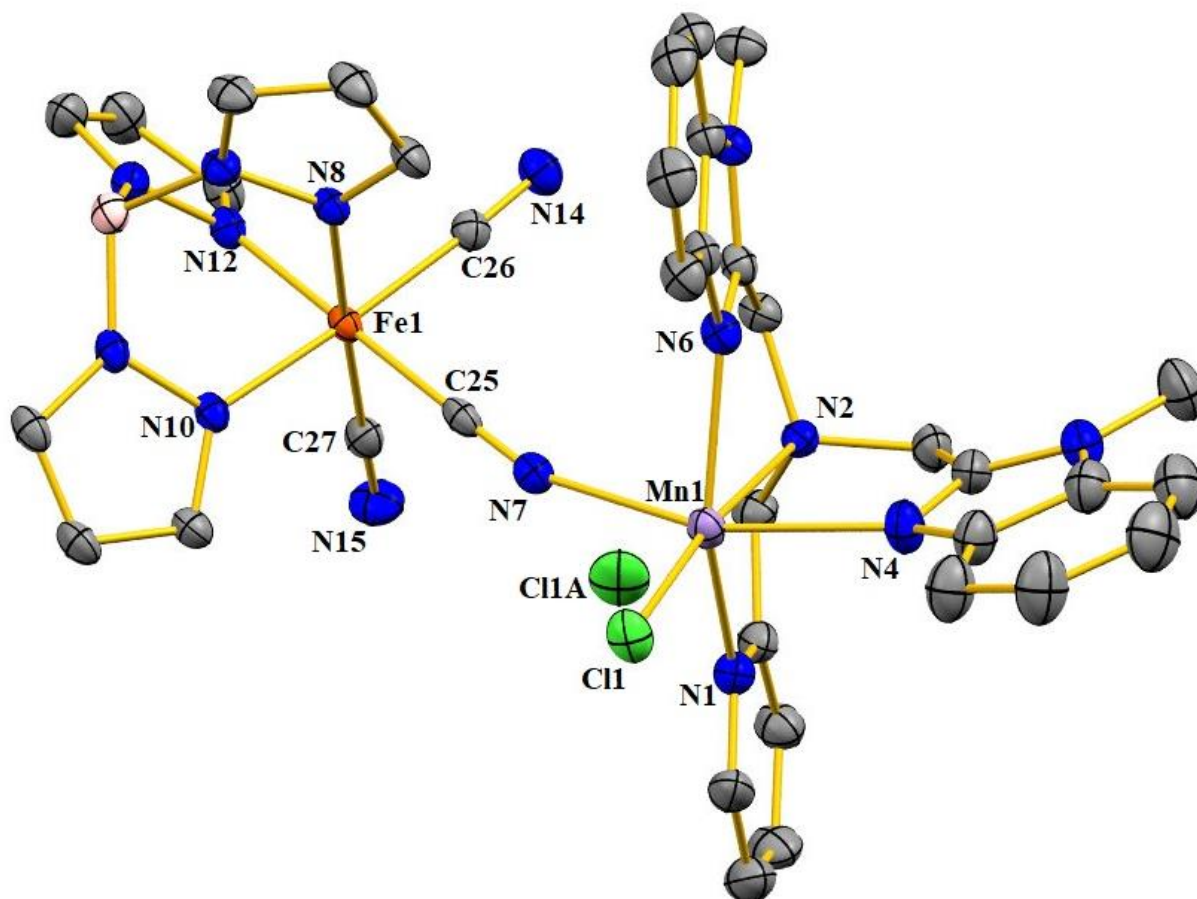

**Fig. S2** Perspective view of metal coordination environment in  $[\text{Fe}^{\text{III}}(\text{Tp})(\text{CN})_2(\mu\text{-CN})\text{-Mn}^{\text{II}}\text{Cl}(\text{L}^1)] \cdot 3\text{DMF} \cdot 3\text{H}_2\text{O}$  (**1**) with split chloride ions (both PART 1 and PART 2). Only donor atoms are labelled. All hydrogen atoms are excluded for clarity. All the solvent molecules in the formula unit are masked.

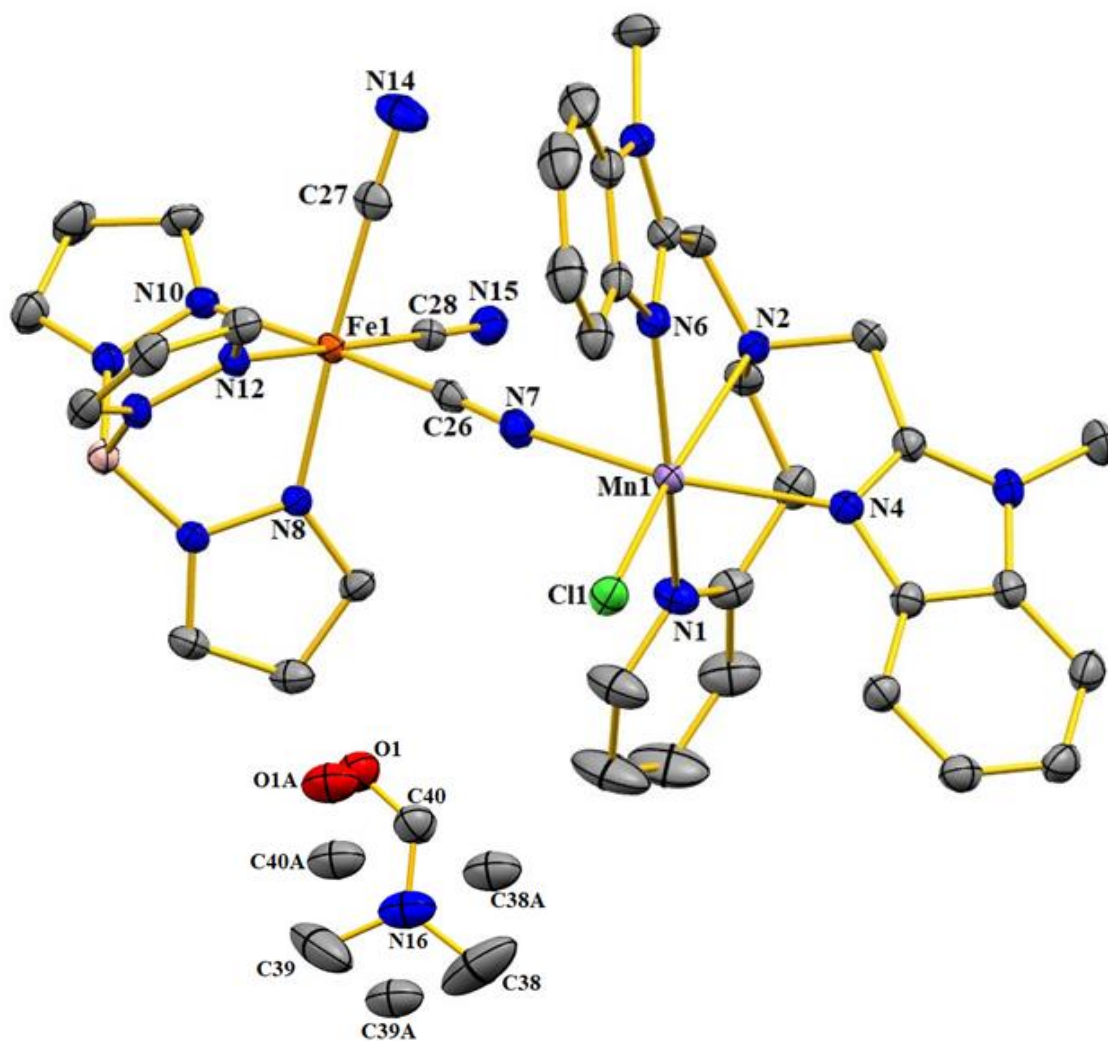

**Fig. S3** Perspective view of metal coordination environment in  $[\text{Fe}^{\text{III}}(\text{Tp})(\text{CN})_2(\mu\text{-CN})\text{Mn}^{\text{II}}\text{Cl}(\text{L}^2)] \cdot \text{DMF}$  (**2**) with modelled DMF molecule (both PART 1 and PART 2). Only donor atoms are labelled. All hydrogen atoms are excluded for clarity.

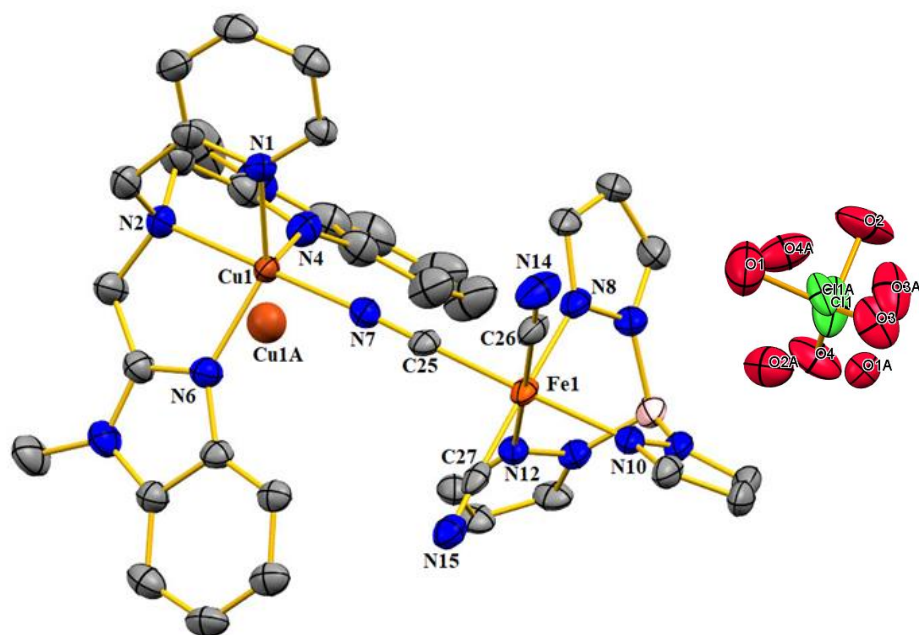

**Fig. S4** Perspective view of metal coordination environment in [Fe<sup>III</sup>(Tp)(CN)<sub>2</sub>(μ-CN)-Cu<sup>II</sup>(L<sup>1</sup>)](ClO<sub>4</sub>)·2CH<sub>3</sub>OH (**3**) with split copper centres and modelled perchlorate ion (both PART 1 and PART 2). Only donor atoms are labelled. All hydrogen atoms and solvent molecules are excluded for clarity.

(a)

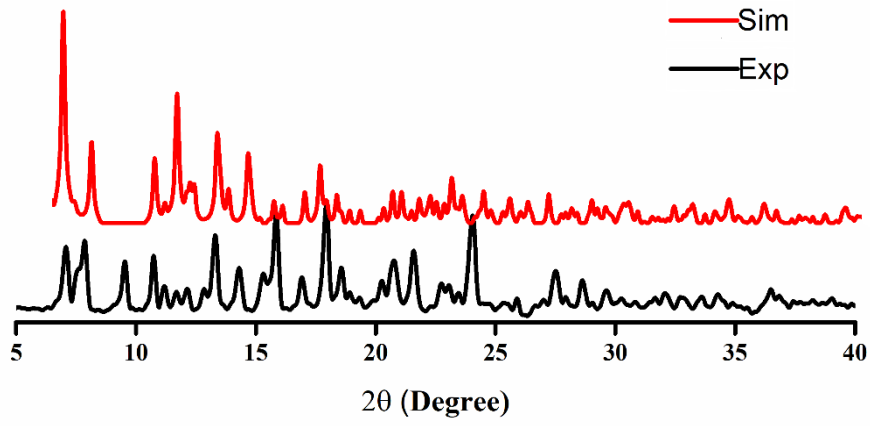

(b)

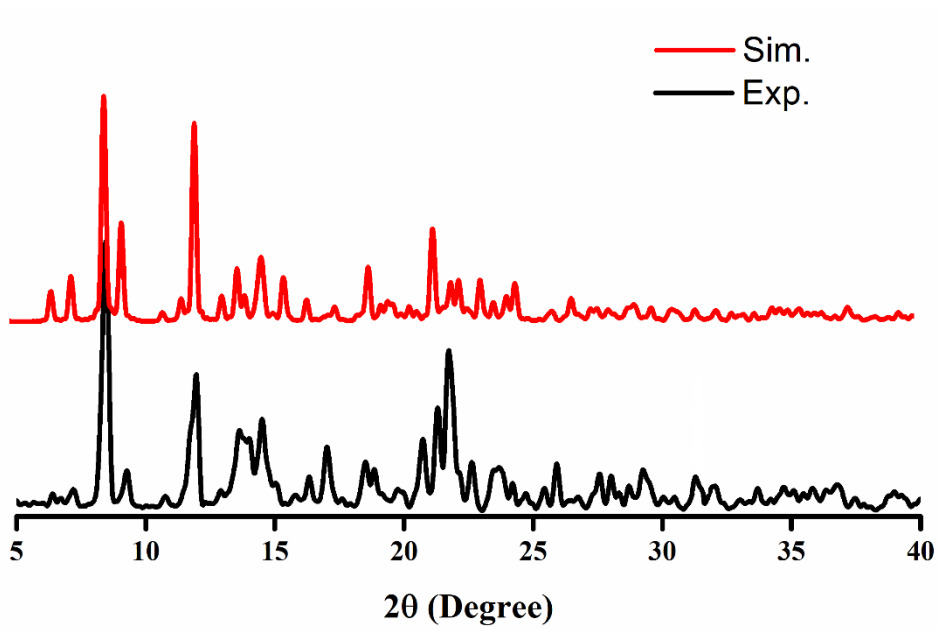

(c)

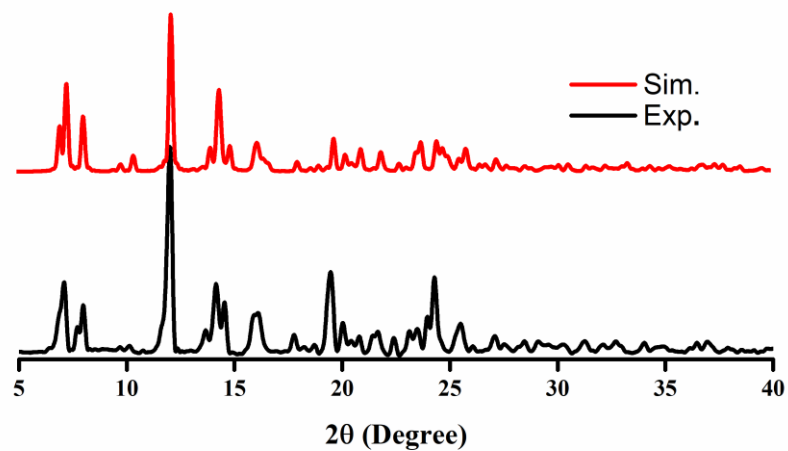

(d)

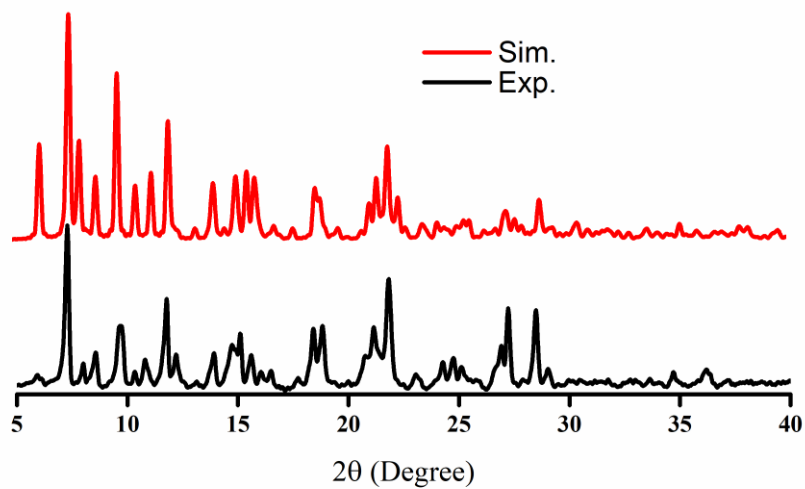

**Fig. S5** XPRD spectra of (a)  $[\text{Fe}^{\text{III}}(\text{Tp})(\text{CN})_2(\mu\text{-CN})\text{Mn}^{\text{II}}\text{Cl}(\text{L}^1)] \cdot 3\text{DMF} \cdot 3\text{H}_2\text{O}$  (**1**), (b)  $[\text{Fe}^{\text{III}}(\text{Tp})(\text{CN})_2(\mu\text{-CN})\text{Mn}^{\text{II}}\text{Cl}(\text{L}^2)] \cdot \text{DMF}$  (**2**), (c)  $[\text{Fe}^{\text{III}}(\text{Tp})(\text{CN})_2(\mu\text{-CN})\text{Cu}^{\text{II}}(\text{L}^1)](\text{ClO}_4) \cdot 2\text{CH}_3\text{OH}$  (**3**) and (d)  $[\text{Fe}^{\text{III}}(\text{Tp})(\text{CN})_2(\mu\text{-CN})\text{Cu}^{\text{II}}(\text{L}^2)](\text{ClO}_4) \cdot 2\text{CH}_3\text{CN}$  (**4**).

(a)

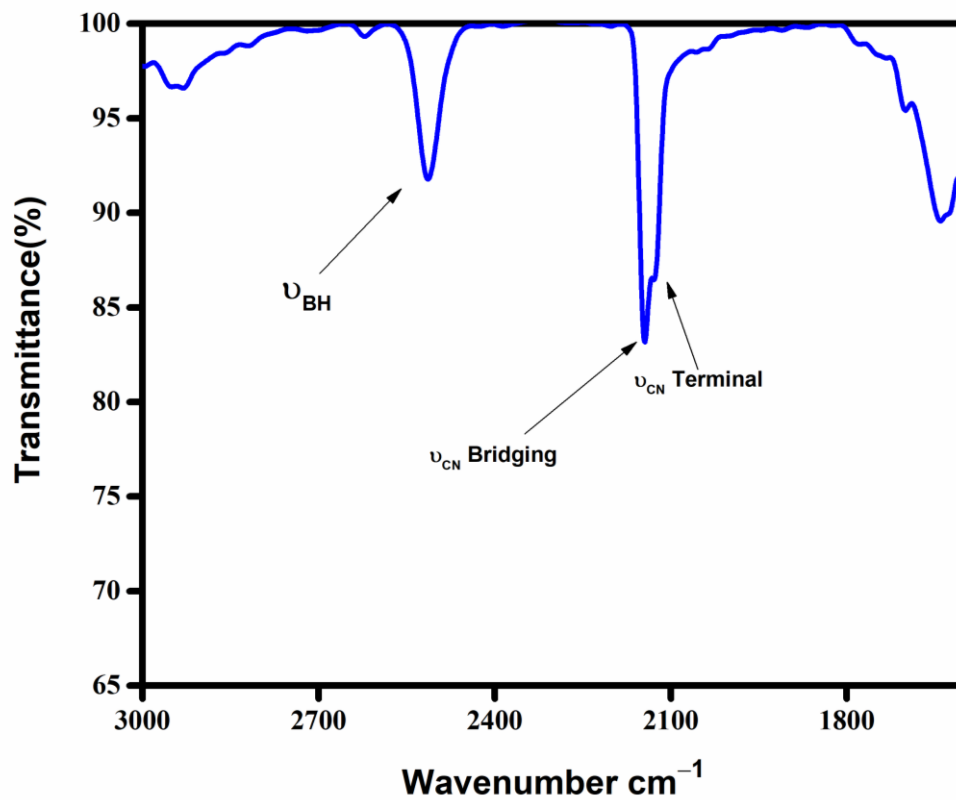

(b)

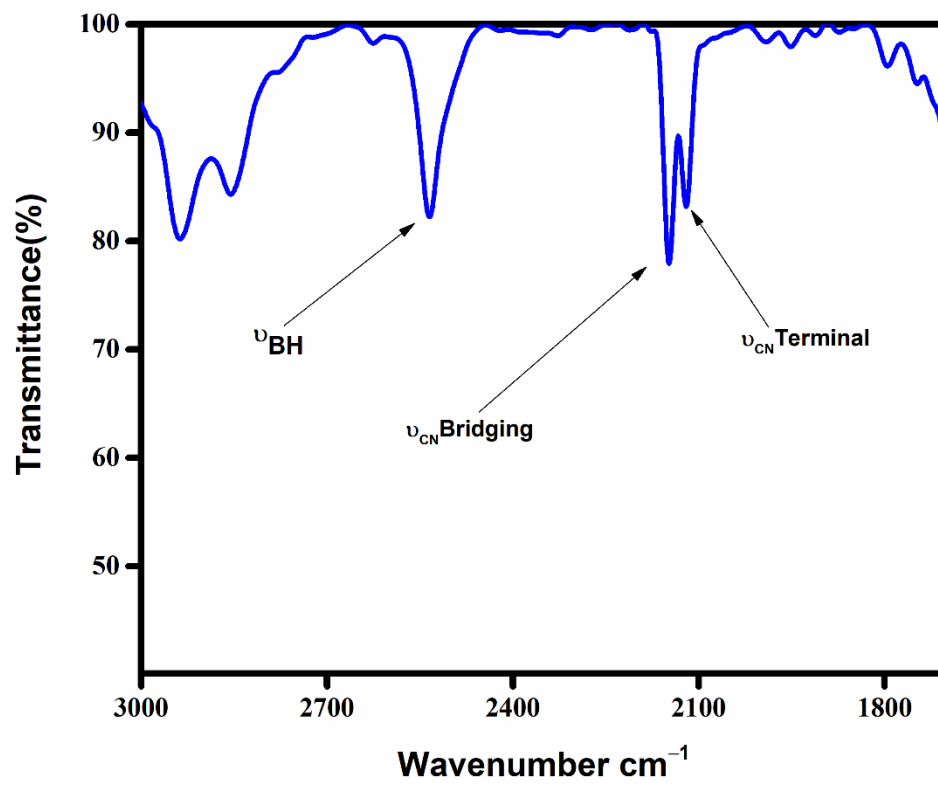



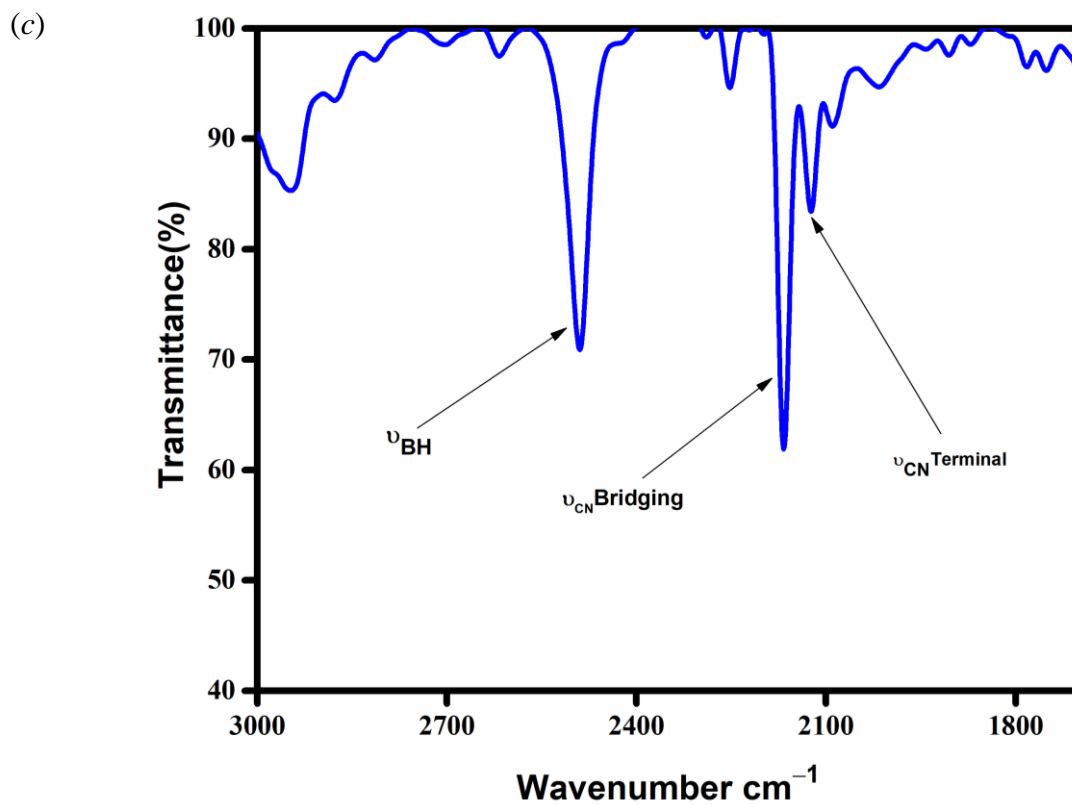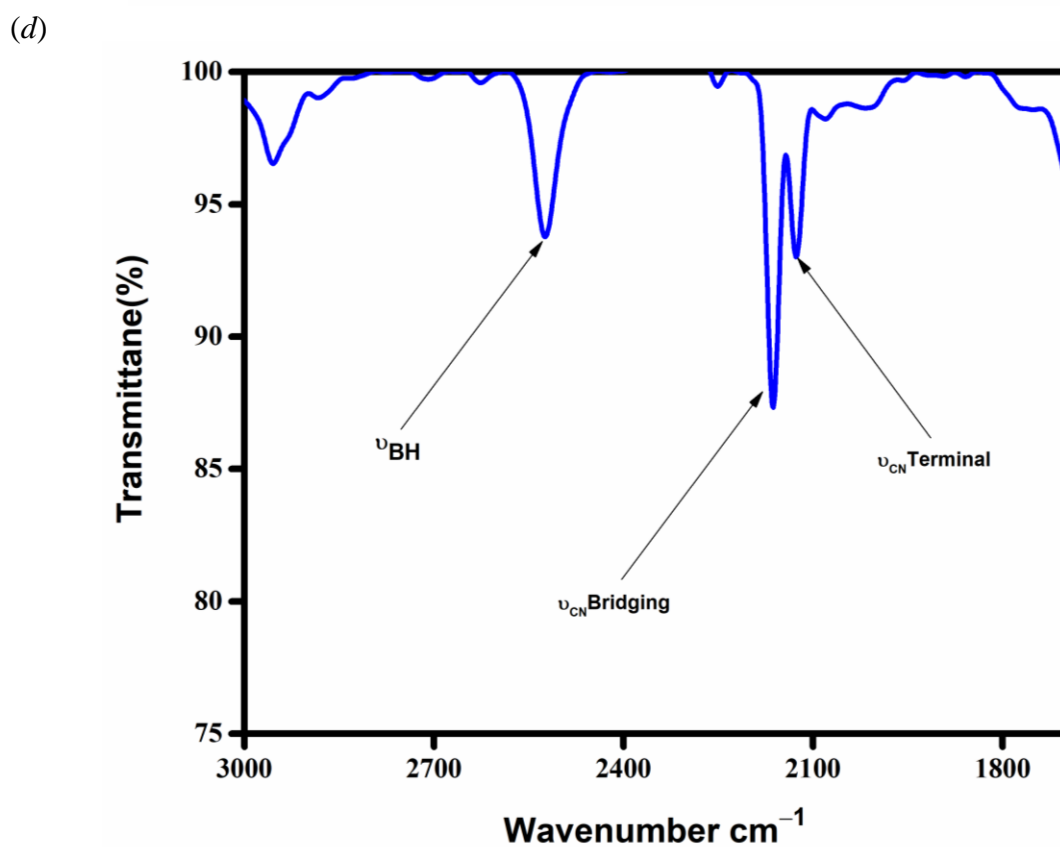

**Fig. S6** Selected portion of IR spectra (in KBr) of (a)  $[\text{Fe}^{\text{III}}(\text{Tp})(\text{CN})_2(\mu\text{-CN})\text{Mn}^{\text{II}}\text{Cl}(\text{L}^1)]\cdot 3\text{DMF}\cdot 3\text{H}_2\text{O}$  (1), (b)  $[\text{Fe}^{\text{III}}(\text{Tp})(\text{CN})_2(\mu\text{-CN})\text{Mn}^{\text{II}}\text{Cl}(\text{L}^2)]\cdot \text{DMF}$  (2), (c)  $[\text{Fe}^{\text{III}}(\text{Tp})(\text{CN})_2(\mu\text{-CN})\text{Cu}^{\text{II}}(\text{L}^1)](\text{ClO}_4)\cdot 2\text{CH}_3\text{OH}$  (3) and (d)  $[\text{Fe}^{\text{III}}(\text{Tp})(\text{CN})_2(\mu\text{-CN})\text{Cu}^{\text{II}}(\text{L}^2)](\text{ClO}_4)\cdot 2\text{CH}_3\text{CN}$  (4).

(a)

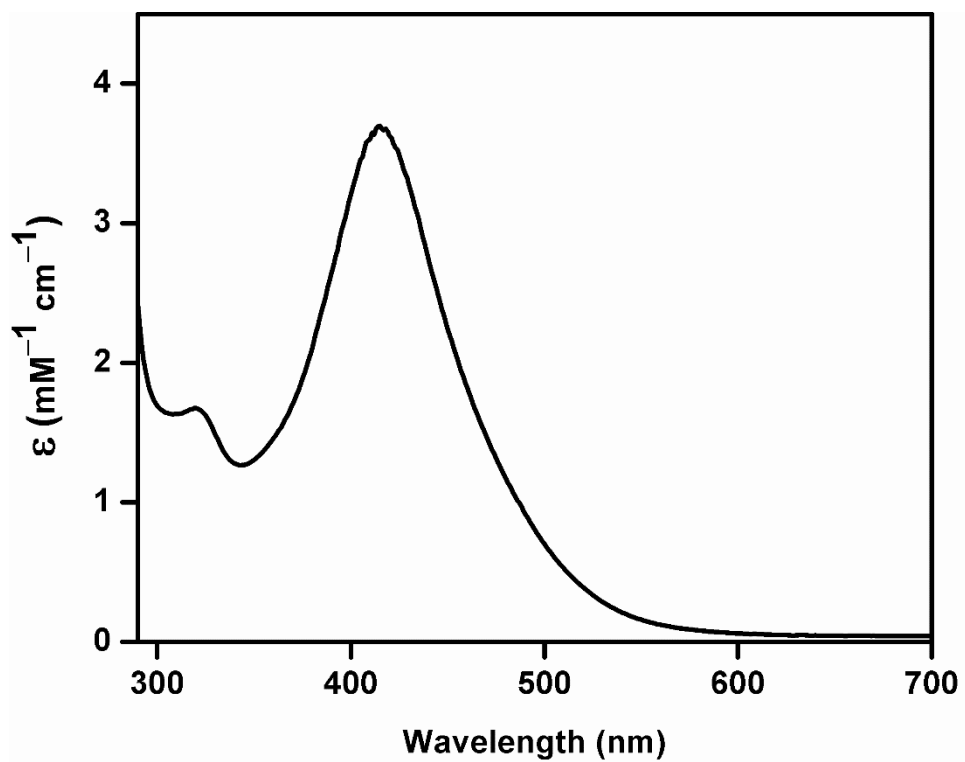

(b)

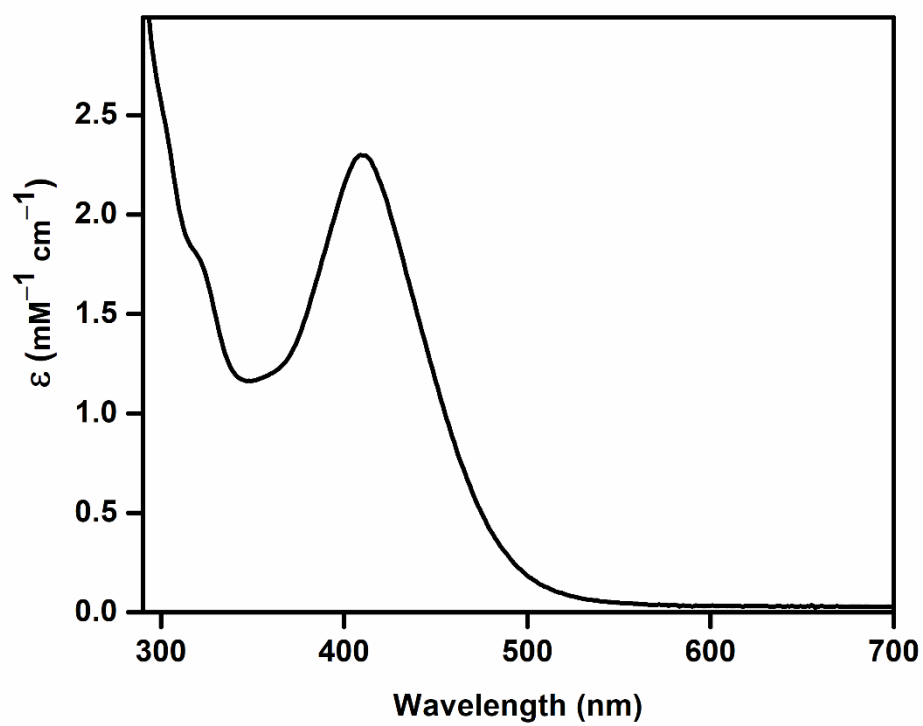

(c)

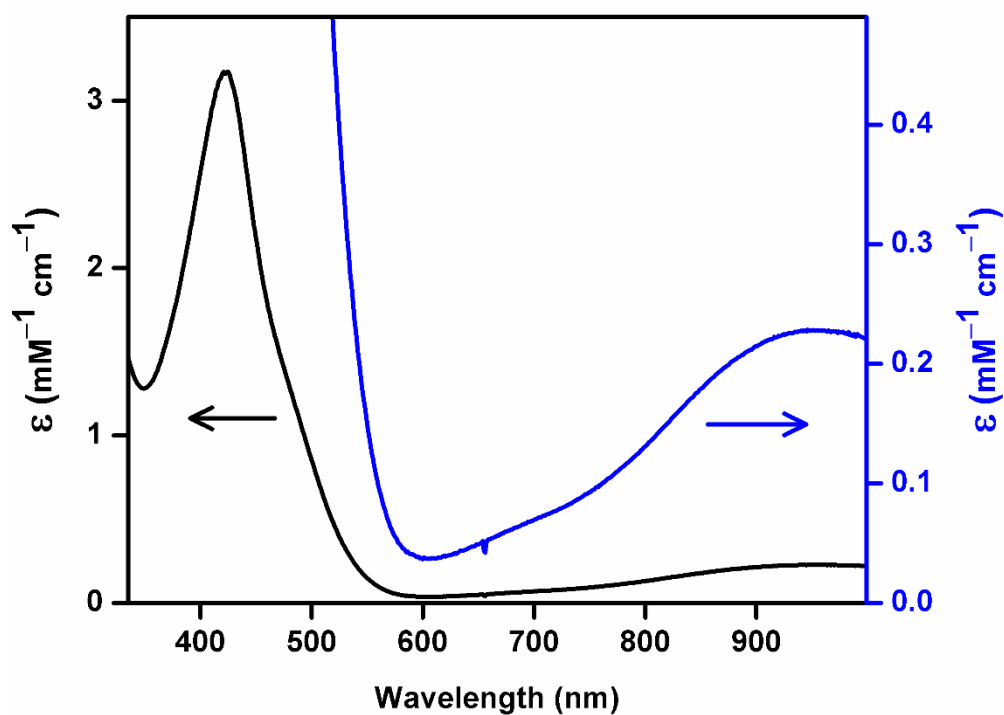

(d)

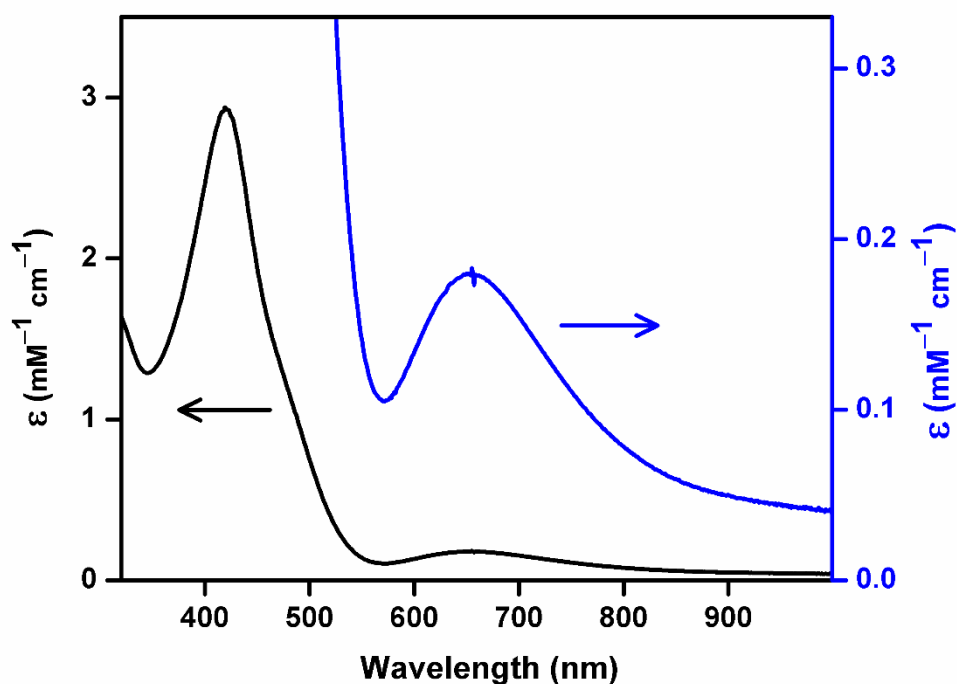

**Fig. S7** Electronic spectra in CH<sub>3</sub>CN of (a) [Fe<sup>III</sup>(Tp)(CN)<sub>2</sub>(μ-CN)Mn<sup>II</sup>Cl(L<sup>1</sup>)]•3DMF•3H<sub>2</sub>O (**1**), (b) [Fe<sup>III</sup>(Tp)(CN)<sub>2</sub>(μ-CN)Mn<sup>II</sup>Cl(L<sup>2</sup>)]•DMF (**2**), (c) [Fe<sup>III</sup>(Tp)(CN)<sub>2</sub>(μ-CN)Cu<sup>II</sup>(L<sup>1</sup>)](ClO<sub>4</sub>)•2CH<sub>3</sub>OH (**3**) and (d) [Fe<sup>III</sup>(Tp)(CN)<sub>2</sub>(μ-CN)Cu<sup>II</sup>(L<sup>2</sup>)](ClO<sub>4</sub>)•2CH<sub>3</sub>CN (**4**).
